# Supplementary material
Source: MDPI journal article supplement (https://www.mdpi.com/2072-4292/15/10/2630)
Supplement: s1 [file s1]

Archive with 2 entries (2 files):
- Table S1 Literature review of possible criteria and supporting spatial datasets.pdf
- Tables S2-S7.pdf
