# Supplementary material
Source: MDPI journal article supplement (https://www.mdpi.com/2072-4292/15/10/2630)
Supplement: s1 [file s1]

**Table S2.** Precipitation classes contribution to Groundwater Recharge Potential (GWRP).

| Spatial datasets | Class | Rank |
|------------------|-------|------|
| Precipitation    | 1441  | 5    |
|                  | 1755  | 7    |
|                  | 2108  | 9    |

**Table S3.** Geology classes contribution to Groundwater Recharge Potential (GWRP).

| Spatial datasets | Class                                                                                                                                    | Rank |
|------------------|------------------------------------------------------------------------------------------------------------------------------------------|------|
| Geology          | Flood plains and associated higher terraces along major streams and abandoned drainage lines                                             | 9    |
|                  | Proglacial lake bottom sediments underlying terraced and channeled surfaces between major morainal belts in lowland and mountain valleys | 9    |
|                  | Outwash and valley train deposits of Naptowne age                                                                                        | 7    |
|                  | Terraced moraines of Naptowne age                                                                                                        | 7    |
|                  | Moraines of Naptowne glaciation, limit of Killey advance                                                                                 | 7    |
|                  | Moraines of Naptowne glaciation, limit of Moosehorn advance                                                                              | 7    |
|                  | Outwash and valley train deposits of Knik age                                                                                            | 5    |
|                  | Terraced moraines of Knik age                                                                                                            | 5    |
|                  | Moraine of Knik glaciation                                                                                                               | 5    |
|                  | Terraced moraines of Eklutna age                                                                                                         | 3    |
|                  | Moraines of Eklutna glaciation                                                                                                           | 3    |
|                  | Tidal silt and beach deposits                                                                                                            | 1    |

**Table S4.** Soil Texture classes contribution to Groundwater Recharge Potential (GWRP).

| Spatial datasets | Class                                | Rank |
|------------------|--------------------------------------|------|
| Soil Texture     | Stratified sand to gravel            | 9    |
|                  | Gravelly sand                        | 9    |
|                  | Extremely gravelly loamy coarse sand | 9    |
|                  | Very gravelly loamy sand             | 9    |
|                  | Loamy sand                           | 8    |
|                  | Loamy fine sand                      | 8    |
|                  | Very cobbly sandy loam               | 8    |
|                  | Gravelly sandy loam                  | 8    |
|                  | Sandy loam                           | 7    |
|                  | Gravelly fine sandy loam             | 8    |
|                  | Very fine sandy loam                 | 7    |
|                  | Silt loam                            | 7    |
|                  | Mucky silt loam                      | 5    |
|                  | Slightly decomposed plant material   | 4    |
|                  | Moderately decomposed plant material | 4    |
|                  | Mucky peat                           | 3    |
|                  | Peat                                 | 1    |

**Table S5.** Slope classes contribution to Groundwater Recharge Potential (GWRP).

| Spatial datasets | Class   | Rank |
|------------------|---------|------|
| Slope            | 0 - 1   | 9    |
|                  | 1 - 2   | 7    |
|                  | 2 - 5   | 5    |
|                  | 5 - 10  | 3    |
|                  | 10 - 70 | 1    |

**Table S6.** Drainage Density classes contribution to Groundwater Recharge Potential (GWRP).

| Spatial datasets | Class   | Rank | 8  |
|------------------|---------|------|----|
|                  |         |      | 9  |
| Drainage Density | 0 - 5   | 9    |    |
|                  | 5 - 6   | 7    | 10 |
|                  | 6 - 7   | 5    | 11 |
|                  | 7 – 10  | 3    | 12 |
|                  | 10 – 13 | 1    | 13 |
|                  |         |      | 14 |

**Table S7.** Land Cover classes contribution to Groundwater Recharge Potential (GWRP).

| Spatial datasets | Class                        | Rank |
|------------------|------------------------------|------|
| Land Cover       | Open water                   | 9    |
|                  | Developed, Open Space        | 4    |
|                  | Developed, Low Intensity     | 3    |
|                  | Developed, Medium Intensity  | 2    |
|                  | Developed, High Intensity    | 1    |
|                  | Barren Land                  | 4    |
|                  | Deciduous Forest             | 6    |
|                  | Evergreen Forest             | 6    |
|                  | Mixed Forest                 | 6    |
|                  | Dwarf Shrub                  | 5    |
|                  | Shrub/Scrub                  | 5    |
|                  | Grasslands/Herbaceous        | 7    |
|                  | Pasture/Hay                  | 7    |
|                  | Woody Wetlands               | 8    |
|                  | Emergent Herbaceous Wetlands | 8    |
