# Supplementary material
Source: MDPI journal article supplement (https://www.mdpi.com/2072-4292/15/10/2630)
Supplement: s1 [file s1]

| Reference                | Spatia datasets |       |         |                  |       |                   |               |               |
|--------------------------|-----------------|-------|---------|------------------|-------|-------------------|---------------|---------------|
|                          | LULC            | Slope | Geology | Drainage Density | Soils | Lineament Density | Precipitation | Geomorphology |
| Achu et al. 2020         | x               | x     | x       | x                | x     | x                 |               | x             |
| Al-Djazouli et al. 2021  | x               | x     | x       | x                |       | x                 | x             |               |
| Arulbalaji et al. 2019   | x               | x     | x       | x                | x     | x                 | x             | x             |
| Chatterjee et al. 2020   | x               |       | x       |                  | x     |                   | x             |               |
| Derdour et al. 2022      | x               | x     | x       | x                |       | x                 | x             |               |
| Fauzia et al. 2021       | x               | x     | x       | x                | x     | x                 |               | x             |
| Gupta et al. 2021        | x               | x     | x       | x                | x     | x                 | x             | x             |
| Hasan et al. 2022        |                 | x     | x       | x                |       |                   |               | x             |
| Jaafarzadeh et al. 2021  | x               | x     | x       | x                | x     |                   | x             |               |
| Jesiya & Gopinath 2020   | x               | x     | x       | x                | x     | x                 |               | x             |
| Kumar et al. 2015        | x               | x     | x       |                  | x     |                   |               | x             |
| Mitra R. & Roy D. 2022   | x               | x     | x       | x                | x     | x                 | x             | x             |
| Mukherjee et al. 2012    | x               | x     | x       | x                | x     | x                 | x             | x             |
| Nasir et al. 2018        | x               | x     | x       | x                | x     | x                 | x             |               |
| Panahi et al. 2017       | x               | x     | x       | x                | x     | x                 | x             |               |
| Pande et al. 2021        | x               | x     |         |                  | x     |                   |               | x             |
| Phong et al. 2021        | x               | x     | x       |                  |       |                   | x             |               |
| Rani et al. 2022         | x               | x     | x       | x                | x     | x                 |               | x             |
| Saranya & Saravanan 2020 | x               | x     | x       | x                | x     | x                 | x             | x             |
| Selvam et al. 2015       | x               | x     | x       | x                | x     | x                 | x             |               |
| Singh et al. 2018        | x               | x     | x       | x                | x     |                   |               |               |
| Singh et al. 2019        | x               | x     | x       | x                | x     |                   |               |               |
| Yeh et al. 2014          | x               | x     | x       | x                |       | x                 |               |               |
| # of studies per dataset | 22              | 22    | 22      | 19               | 18    | 15                | 13            | 12            |

| Reference                | Spatia datasets |     |        |                   |           |                    |      |                    |         |
|--------------------------|-----------------|-----|--------|-------------------|-----------|--------------------|------|--------------------|---------|
|                          | Elevation       | TWI | Aspect | Groundwater level | Curvature | Distance to Rivers | NDVI | Distance to faults | Fissure |
| Achu et al. 2020         |                 |     |        |                   |           |                    |      |                    |         |
| Al-Djazouli et al. 2021  |                 |     |        |                   |           |                    |      |                    |         |
| Arulbalaji et al. 2019   |                 | x   |        |                   | x         |                    |      |                    |         |
| Chatterjee et al. 2020   |                 | x   |        |                   |           |                    |      |                    |         |
| Derdour et al. 2022      | x               |     |        | x                 |           |                    |      |                    |         |
| Fauzia et al. 2021       |                 |     |        |                   |           |                    |      |                    | x       |
| Gupta et al. 2021        |                 |     |        |                   |           |                    |      |                    |         |
| Hasan et al. 2022        |                 |     |        |                   |           |                    |      |                    |         |
| Jaafarzadeh et al. 2021  |                 | x   | x      |                   | x         | x                  | x    | x                  |         |
| Jesiya & Gopinath 2020   |                 |     |        |                   |           |                    |      |                    |         |
| Kumar et al. 2016        |                 |     |        |                   |           |                    |      |                    |         |
| Mitra R. & Roy D. 2022   | x               |     |        | x                 |           |                    |      |                    |         |
| Mukherjee et al. 2012    |                 |     |        | x                 |           |                    |      |                    |         |
| Nasir et al. 2018        |                 |     |        |                   |           |                    |      |                    |         |
| Panahi et al. 2017       |                 |     |        |                   |           |                    |      |                    |         |
| Pande et al. 2021        |                 |     | x      | x                 |           |                    | x    |                    |         |
| Phong et al. 2021        | x               | x   | x      |                   | x         | x                  |      | x                  |         |
| Rani et al. 2022         | x               |     |        |                   |           |                    |      |                    |         |
| Saranya & Saravanan 2020 | x               |     |        |                   |           |                    |      |                    |         |
| Selvam et al. 2014       |                 |     |        |                   |           |                    |      |                    |         |
| Singh et al. 2018        |                 |     |        |                   |           | x                  |      |                    |         |
| Singh et al. 2019        |                 |     | x      |                   |           |                    |      |                    |         |
| Yeh et al. 2014          |                 |     |        |                   |           |                    |      |                    |         |
| # of studies per dataset | 5               | 4   | 4      | 4                 | 3         | 3                  | 2    | 2                  | 1       |

| Reference                | Spatia datasets |           |                |                   |                    |     |     |            |
|--------------------------|-----------------|-----------|----------------|-------------------|--------------------|-----|-----|------------|
|                          | Roughness       | Hillshade | Flow Direction | Flow Accumulation | Runoff Coefficient | SPI | TPI | Well yield |
| Achu et al. 2020         |                 |           |                |                   |                    |     |     |            |
| Al-Djazouli et al. 2021  |                 |           |                |                   |                    |     |     |            |
| Arulbalaji et al. 2019   | x               |           |                |                   |                    |     | x   |            |
| Chatterjee et al. 2020   |                 |           |                |                   |                    |     |     |            |
| Derdour et al. 2022      |                 |           |                |                   |                    |     |     |            |
| Fauzia et al. 2021       |                 |           |                |                   |                    |     |     |            |
| Gupta et al. 2021        |                 |           |                |                   |                    |     |     |            |
| Hasan et al. 2022        |                 |           |                |                   |                    |     |     |            |
| Jaafarzadeh et al. 2021  |                 |           |                |                   |                    | x   |     |            |
| Jesiya & Gopinath 2020   |                 |           |                |                   |                    |     |     |            |
| Kumar et al. 2016        |                 |           |                |                   |                    |     |     |            |
| Mitra R. & Roy D. 2022   |                 |           |                |                   |                    |     |     |            |
| Mukherjee et al. 2012    |                 |           |                |                   |                    |     |     |            |
| Nasir et al. 2018        |                 |           |                |                   |                    |     |     |            |
| Panahi et al. 2017       |                 |           |                |                   |                    |     |     |            |
| Pande et al. 2021        |                 | x         | x              |                   |                    |     |     |            |
| Phong et al. 2021        |                 |           |                | x                 |                    |     |     | x          |
| Rani et al. 2022         |                 |           |                |                   |                    |     |     |            |
| Saranya & Saravanan 2020 |                 |           |                |                   |                    |     |     |            |
| Selvam et al. 2014       |                 |           |                |                   |                    |     |     |            |
| Singh et al. 2018        |                 |           |                |                   | x                  |     |     |            |
| Singh et al. 2019        |                 |           |                |                   |                    |     |     |            |
| Yeh et al. 2014          |                 |           |                |                   |                    |     |     |            |
| # of studies per dataset | 1               | 1         | 1              | 1                 | 1                  | 1   | 1   | 1          |

| Reference                | Spatia datasets        |                   |                   | # of Parameters |
|--------------------------|------------------------|-------------------|-------------------|-----------------|
|                          | Aquifer transmissivity | Depth to basement | Infiltration Rate |                 |
| Achu et al. 2020         |                        |                   |                   | 7               |
| Al-Djazouli et al. 2021  |                        |                   |                   | 6               |
| Arulbalaji et al. 2019   |                        |                   |                   | 12              |
| Chatterjee et al. 2020   |                        |                   |                   | 5               |
| Derdour et al. 2022      |                        |                   |                   | 8               |
| Fauzia et al. 2021       |                        | x                 | x                 | 10              |
| Gupta et al. 2021        |                        |                   |                   | 8               |
| Hasan et al. 2022        | x                      |                   |                   | 5               |
| Jaafarzadeh et al. 2021  |                        |                   |                   | 13              |
| Jesiya & Gopinath 2020   |                        |                   |                   | 7               |
| Kumar et al. 2016        |                        |                   |                   | 5               |
| Mitra R. & Roy D. 2022   |                        |                   |                   | 10              |
| Mukherjee et al. 2012    |                        |                   |                   | 9               |
| Nasir et al. 2018        |                        |                   |                   | 7               |
| Panahi et al. 2017       |                        |                   |                   | 7               |
| Pande et al. 2021        |                        |                   |                   | 9               |
| Phong et al. 2021        |                        |                   |                   | 12              |
| Rani et al. 2022         |                        |                   |                   | 8               |
| Saranya & Saravanan 2020 |                        |                   |                   | 9               |
| Selvam et al. 2014       |                        |                   |                   | 7               |
| Singh et al. 2018        |                        |                   |                   | 7               |
| Singh et al. 2019        |                        |                   |                   | 6               |
| Yeh et al. 2014          |                        |                   |                   | 5               |
| # of studies per dataset | 1                      | 1                 | 1                 |                 |
